# Supplementary material
Source: MDPI journal article supplement (https://www.mdpi.com/2073-4441/15/24/4241)
Supplement: s1 [file s1]

*Supporting Information Materials for*

**Multi-heteroatom doped Fe@CN activation peroxomonosulfate for the removal of trace organic contaminants from water: optimizing fabrication and performance**

Jiamin Chen <sup>1</sup>, Ruijun Ren <sup>1</sup>, Yatao Liu <sup>1</sup>, Chen Li <sup>1</sup>, Zhenbei Wang <sup>1</sup>, Fei Qi <sup>1,\*</sup>

<sup>1</sup> Beijing Key Lab for Source Control Technology of Water Pollution, College of Environmental Science and Engineering, Beijing Forestry University, Beijing 100083, China

\* Corresponding author: Prof. Fei Qi

Tel.: +86 10 62336615; Fax: +86 10 62336596

Email address: [qifei@bjfu.edu.cn](mailto:qifei@bjfu.edu.cn); [qifei\\_hit@163.com](mailto:qifei_hit@163.com) (Fei. Qi)

## List of Captions

Text S1. EPR and Electrochemical experimental procedures

Table S1. Reagents and dosage for the preparation of X-C<sub>3</sub>N<sub>4</sub>.

Table S2. The list of abbreviation

Table S3. Diffraction angles and layer spacings corresponding to the (002) crystal planes of X-C<sub>3</sub>N<sub>4</sub>

Table S4. The predicted content of S, P and B without considering the losses during the preparation process

Table S5. Elemental content of prepared X-Fe@CN by EDS analysis

Table S6. The element compositions each element of prepared FexCN-650, Fe@CN, P-Fe@CN, B-Fe@CN and PB-Fe@CN.

Table S7. The relative content of C 1s species of prepared FexCN-650, Fe@CN, P-Fe@CN, B-Fe@CN and PB-Fe@CN

Table S8. The relative content of Fe 2p species of prepared FexCN-650, Fe@CN, P-Fe@CN, B-Fe@CN and PB-Fe@CN

Table S9. The relative content of O 1s species of prepared FexCN-650, Fe@CN, P-Fe@CN, B-Fe@CN and PB-Fe@CN

Table S10. The relative content of N 1s species of prepared FexCN-650, Fe@CN, P-Fe@CN, B-Fe@CN and PB-Fe@CN

Figure S1. The C 1s high-resolution XPS spectra of prepared (a) FexCN-650, (b)

Fe@CN, (c) P-Fe@CN, (d) B-Fe@CN and (e) PB-Fe@CN

Figure S2. The Fe 2p high-resolution XPS spectra of prepared (a) FexCN-650, (b)

Fe@CN, (c) P-Fe@CN, (d) B-Fe@CN and (e) PB-Fe@CN

Figure S3. The correlation of  $k_{\text{obs}}$  of DIC and ATL removal to  $\text{Fe}^0$  content.

Figure S4. The correlation of  $k_{\text{obs}}$  of DIC and ATL removal to P-N bond content.

Figure S5. EPR spectra obtained using DMPO as spin-trapping agents in anhydrous ethanol

## Test S1 EPR and Electrochemical experimental procedures

ESR was used to qualitatively identify  $\text{SO}_4^{\bullet-}$ ,  $\cdot\text{OH}$ , and  $^1\text{O}_2$  in the reaction system.  $\text{SO}_4^{\bullet-}$  and  $\cdot\text{OH}$  were captured using the capture agent DMPO at a concentration of 88.0 mM, and  $^1\text{O}_2$  was captured using the capture agent TEMP at a concentration of 14.2 mM. The experimental procedure was similar to the degradation experiments but without the addition of contaminants. 0.3 mL of the sample solution was mixed with 0.3 mL of the capture agent solution at 0, 5, 15, 30, 45, and 60 min after the start of the reaction, and then the samples were loaded and tested by capillary tube after mixing. The test conditions were as follows: scanning width of 100 G, microwave attenuation of 10 dB, modulation amplitude of 1.0 G, central magnetic field of 3521.45 G, microwave frequency of 9.856 GHz, microwave power of 4.0 mW, and scanning time of 80 s.

The working electrodes of FexCN-650, Fe@CN, P-Fe@CN, B-Fe@CN and PB-Fe@CN were prepared as follows (FexCN-650 was taken as an example): Add 0.010 g of FexCN-650 catalyst powder before reaction into 1.0 mL of anhydrous ethanol, add 0.05 mL of Nafion reagent to the above solution, and fully sonicate the catalyst to make it evenly dispersed. 10.0  $\mu\text{L}$  of the dispersed solution was added dropwise onto the surface of a glassy carbon electrode (5 mm in diameter) and dried naturally for 12 h. The catalysts were used for the electrochemical analysis using an electrochemical workstation. An electrochemical workstation was used for electrochemical testing. A three-electrode system was constructed, with the prepared FexCN-650 electrode sheet

as the working electrode, the platinum wire electrode as the counter electrode, the silver/silver chloride electrode as the reference electrode, and the electrolyte as 0.05 mol/L  $\text{Na}_2\text{SO}_4$  solution. The working parameters were set as follows: initial potential -2.0 V, voltage setting -2.0 V~2.5 V, scanning rate 10 mV/s, and CV curve was measured. The working parameters were set as follows: frequency 0.01~106 Hz, and the EIS curve was measured. Set the working parameters as: voltage setting -0.8 V~0.2V, scan rate 10 mV/s.

**Table S1. Reagents and dosage for the preparation of X-C<sub>3</sub>N<sub>4</sub> in ceramic crucibles**

| X-C <sub>3</sub> N <sub>4</sub>   | Adding dose of specific chemicals (g)        |                                  |                                |                                                | Fabrication parameters |                    |                  |
|-----------------------------------|----------------------------------------------|----------------------------------|--------------------------------|------------------------------------------------|------------------------|--------------------|------------------|
|                                   | C <sub>3</sub> H <sub>6</sub> N <sub>6</sub> | CH <sub>4</sub> N <sub>2</sub> S | H <sub>3</sub> BO <sub>3</sub> | NH <sub>4</sub> H <sub>2</sub> PO <sub>4</sub> | Calcination temp. (°C) | Ramp rate (°C/min) | holding time (h) |
| g-C <sub>3</sub> N <sub>4</sub>   | 10                                           | -                                | -                              | -                                              | 550                    | 5                  | 4                |
| S-C <sub>3</sub> N <sub>4</sub>   | 4                                            | 2                                | -                              | -                                              | 550                    | 5                  | 4                |
| B-C <sub>3</sub> N <sub>4</sub>   | 5                                            | -                                | 0.62                           | -                                              | 500                    | 10                 | 1.5              |
| SB-C <sub>3</sub> N <sub>4</sub>  | 10                                           | 5                                | 0.62                           | -                                              | 550                    | 5                  | 3                |
| P-C <sub>3</sub> N <sub>4</sub>   | 5                                            | -                                | -                              | 0.1                                            | 550                    | 2                  | 2                |
| SP-C <sub>3</sub> N <sub>4</sub>  | 10                                           | 5                                | -                              | 0.2                                            | 550                    | 2                  | 2                |
| PB-C <sub>3</sub> N <sub>4</sub>  | 10                                           | -                                | 0.62                           | 0.2                                            | 550                    | 2                  | 2                |
| SPB-C <sub>3</sub> N <sub>4</sub> | 10                                           | 5                                | 0.62                           | 0.3                                            | 550                    | 2                  | 2                |

**Table S2. The list of abbreviation**

| Abbreviated word or phrase      | Full name                                    |
|---------------------------------|----------------------------------------------|
| TOrCs                           | trace organic contaminants                   |
| SR-AOPs                         | sulfate radical advanced oxidation processes |
| MOFs                            | metal-organic frameworks                     |
| DIC                             | dicamba                                      |
| ATL                             | atenolol                                     |
| PMS                             | Peroxymonosulfate                            |
| DMF                             | N,N-dimethylformamide                        |
| DMPO                            | 5,5-dimethyl-1-pyrroline N-oxide             |
| TEMP                            | 2,2,6,6-tetramethylpiperidine                |
| g-C <sub>3</sub> N <sub>4</sub> | Graphitic carbon nitride                     |
| SEM                             | scanning electron microscopy                 |
| XD                              | X-ray powder diffraction analyzer            |
| XPS                             | X-ray photoelectron spectroscopy             |
| CV                              | cyclic voltammetry                           |
| EIS                             | electrochemical impedance spectroscopy       |
| TfL                             | Tafel                                        |
| HPLC                            | high performance liquid chromatography       |
| EPR                             | electron paramagnetic resonance spectrometer |

**Table S3. Diffraction angles and layer spacings corresponding to the (002) crystal planes of X-C<sub>3</sub>N<sub>4</sub>**

| X-C <sub>3</sub> N <sub>4</sub> | g-C <sub>3</sub> N <sub>4</sub> | S-C <sub>3</sub> N <sub>4</sub> | P-C <sub>3</sub> N <sub>4</sub> | B-C <sub>3</sub> N <sub>4</sub> | SP-C <sub>3</sub> N <sub>4</sub> | SB-C <sub>3</sub> N <sub>4</sub> | PB-C <sub>3</sub> N <sub>4</sub> | SPB-C <sub>3</sub> N <sub>4</sub> |
|---------------------------------|---------------------------------|---------------------------------|---------------------------------|---------------------------------|----------------------------------|----------------------------------|----------------------------------|-----------------------------------|
| $2\theta$ (°)                   | 27.6                            | 27.58                           | 27.42                           | 26.74                           | 27.579                           | 27.18                            | 27.459                           | 27.6                              |
| d (nm)                          | 0.323                           | 0.323                           | 0.325                           | 0.331                           | 0.323                            | 0.328                            | 0.325                            | 0.323                             |



**Table S4. Elemental content of prepared X-Fe@CN by EDS analysis**

[illegible]

**Table S5. The predicted content of S, P and B without considering the losses during the preparation process**

|   | S-Fe@CN | P-Fe@CN | B-Fe@CN | SP-Fe@CN | SB-Fe@CN | PB-Fe@CN | SPB-Fe@CN | Units |
|---|---------|---------|---------|----------|----------|----------|-----------|-------|
| S | 7.022   | -       | -       | 6.929    | 6.743    | -        | 5.059     | wt.%  |
| P | -       | 0.264   | -       | 0.177    | -        | 0.249    | 0.170     | wt.%  |
| B | -       | -       | 0.964   | -        | 0.347    | 0.501    | 0.501     | wt.%  |

**Table S6. The element compositions of prepared FexCN-650, Fe@CN, P-Fe@CN, B-Fe@CN and PB-Fe@CN**

| Catalyst  | C (at.%) | N (at.%) | O (at.%) | Fe (at.%) | P (at.%) | B (at.%) |
|-----------|----------|----------|----------|-----------|----------|----------|
| FexCN-650 | 72.45    | 6.44     | 17.21    | 3.9       | -        | -        |
| Fe@CN     | 71.29    | 9.14     | 16.62    | 2.94      | -        | -        |
| P-Fe@CN   | 59.65    | 12.37    | 21.78    | 4.09      | 2.11     | -        |
| B-Fe@CN   | 63.56    | 7.99     | 19.2     | 3.02      | -        | 6.24     |
| PB-Fe@CN  | 58.04    | 8.59     | 20.64    | 3.71      | 1.4      | 7.63     |

**Table S7. The relative content of C 1s species of prepared FexCN-650, Fe@CN, P-Fe@CN, B-Fe@CN and PB-Fe@CN**

| Catalyst     | FexCN-650 | Fe@CN | P-Fe@CN | B-Fe@CN | PB-Fe@CN |
|--------------|-----------|-------|---------|---------|----------|
| C-C (at.%)   | 44.31     | 46.67 | 39.18   | 37.11   | 39.42    |
| C-N (at.%)   | 10.07     | 11.77 | 7.94    | 22.00   | 7.08     |
| C-O (at.%)   | 13.75     | 5.23  | 10.56   | 4.45    | 4.27     |
| N-C=N (at.%) | -         | 7.61  | 1.85    | -       | 4.32     |
| O-C=O (at.%) | 4.32      | -     | 0.13    | -       | 2.95     |

**Table S8. The relative content of Fe 2p species of prepared FexCN-650, Fe@CN, P-Fe@CN, B-Fe@CN and PB-Fe@CN**

| Catalyst                                  | FexCN-650 | Fe@CN | P-Fe@CN | B-Fe@CN | PB-Fe@CN |
|-------------------------------------------|-----------|-------|---------|---------|----------|
| Fe <sup>0</sup> (at.%)                    | 0.01      | 0.04  | 0.11    | 0.04    | 0.15     |
| Fe <sup>2+</sup> 2p <sub>3/2</sub> (at.%) | 0.72      | 1.06  | 1.39    | 0.84    | 0.63     |
| Fe <sup>3+</sup> 2p <sub>3/2</sub> (at.%) | 1.84      | 0.59  | 0.63    | 1.05    | 1.72     |
| sat Fe <sup>3+</sup> (at.%)               | 0.08      | 0.28  | 1.09    | 0.19    | 0.27     |
| Fe <sup>2+</sup> 2p <sub>1/2</sub> (at.%) | 0.55      | 0.53  | 0.55    | 0.57    | 0.28     |
| Fe <sup>3+</sup> 2p <sub>1/2</sub> (at.%) | 0.61      | 0.32  | 0.23    | 0.18    | 0.55     |
| sat Fe <sup>2+</sup> (at.%)               | 0.09      | 0.13  | 0.10    | 0.15    | 0.09     |

**Table S9. The relative content of O 1s species of prepared FexCN-650, Fe@CN, P-Fe@CN, B-Fe@CN and PB-Fe@CN**

| Catalyst               | FexCN-650 | Fe@CN | P-Fe@CN | B-Fe@CN | PB-Fe@CN |
|------------------------|-----------|-------|---------|---------|----------|
| Fe-O (at.%)            | 4.46      | 4.23  | 5.75    | 4.84    | 5.07     |
| C=O (at.%)             | 5.83      | 4.61  | 10.83   | 7.75    | 5.93     |
| C-OH (at.%)            | 2.15      | 2.63  | 3.15    | 3.63    | 5.78     |
| Absorbed Oxygen (at.%) | 4.76      | 5.15  | 2.05    | 2.99    | 3.86     |

**Table S10. The relative content of N 1s species of prepared FexCN-650, Fe@CN, P-Fe@CN, B-Fe@CN and PB-Fe@CN**

| Catalyst            | FexCN-650 | Fe@CN | P-Fe@CN | B-Fe@CN | PB-Fe@CN |
|---------------------|-----------|-------|---------|---------|----------|
| Pyridinic N (at.%)  | 3.17      | 3.77  | 2.59    | 2.17    | 1.70     |
| Fe-N (at.%)         | -         | -     | 3.79    | 1.52    | 1.99     |
| Pyrrolic N (at.%)   | 1.06      | 1.84  | 1.41    | 1.92    | 2.19     |
| Quaternary N (at.%) | 0.89      | 1.58  | 1.83    | 1.27    | 1.66     |
| Graphite N (at.%)   | 0.53      | 0.45  | 2.09    | 0.82    | 1.05     |
| N-O (at.%)          | 0.80      | 1.50  | 0.67    | 0.29    | -        |

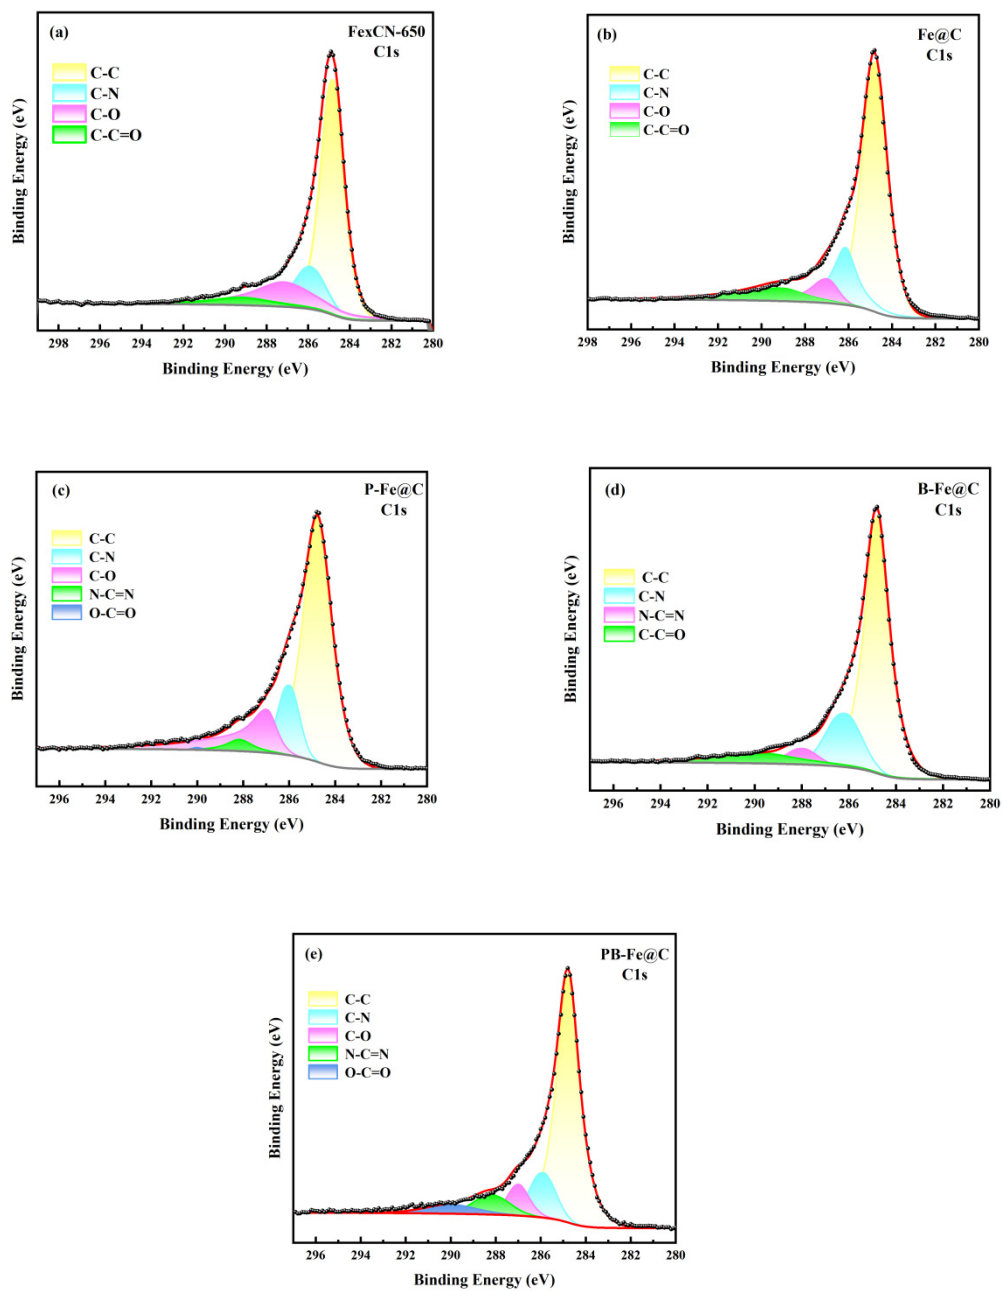

**Figure S1. The C 1s high-resolution spectra of (a) FexCN-650, (b) Fe@CN, (c) P-Fe@CN, (d) B-Fe@CN and (e) PB-Fe@CN.**



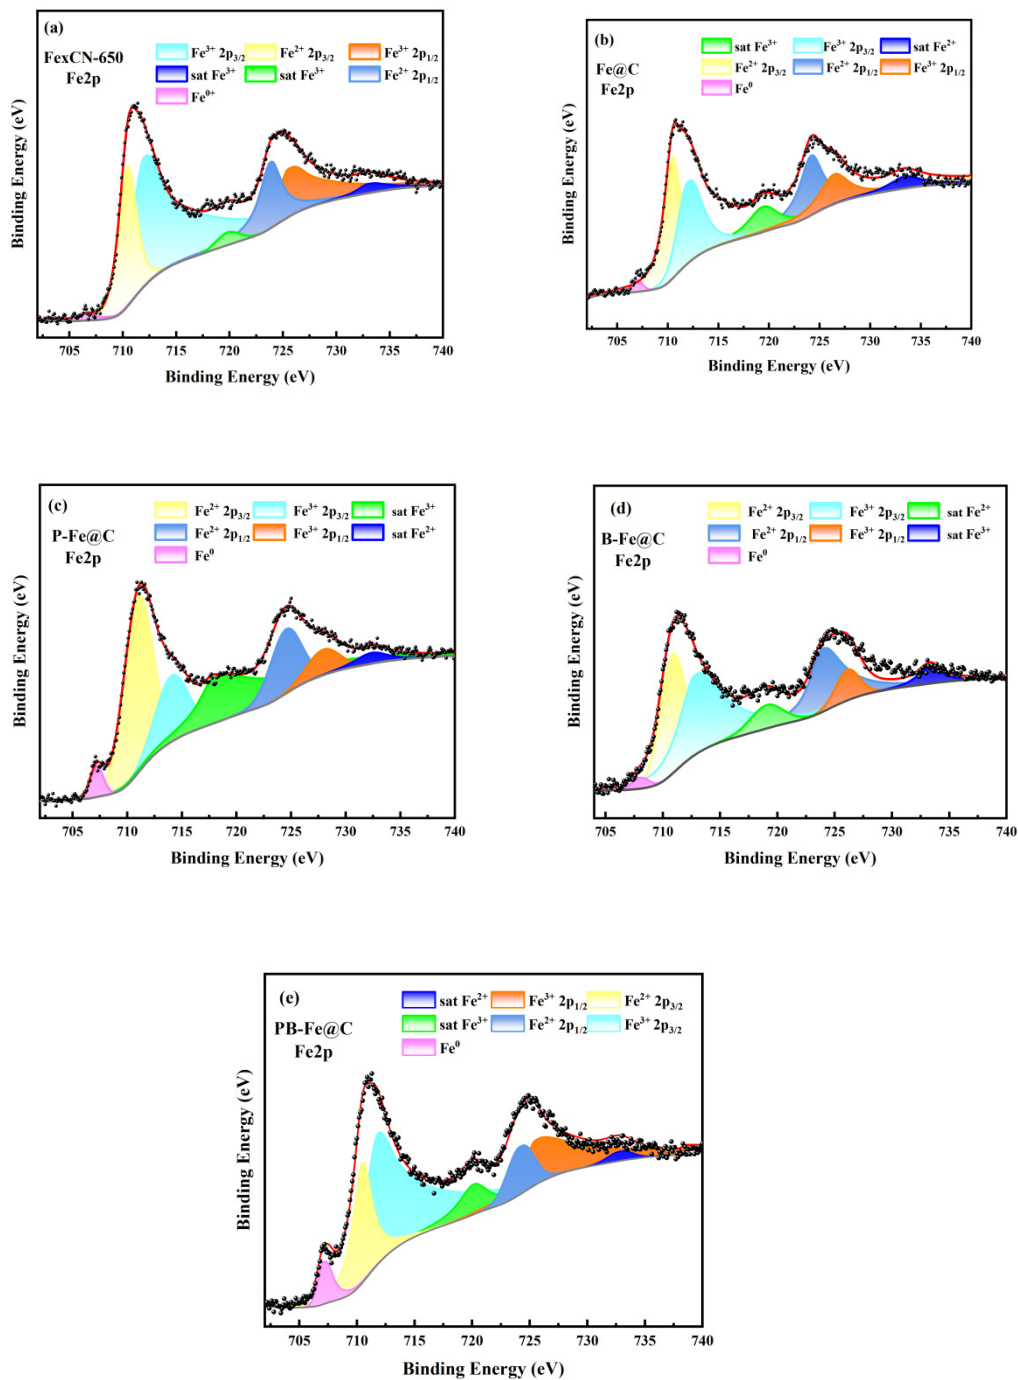

**Figure S2. The Fe 2p high-resolution spectra of prepared (a) FexCN-650, (b) Fe@CN, (c) P-Fe@CN, (d) B-Fe@CN and (e) PB-Fe@CN.**

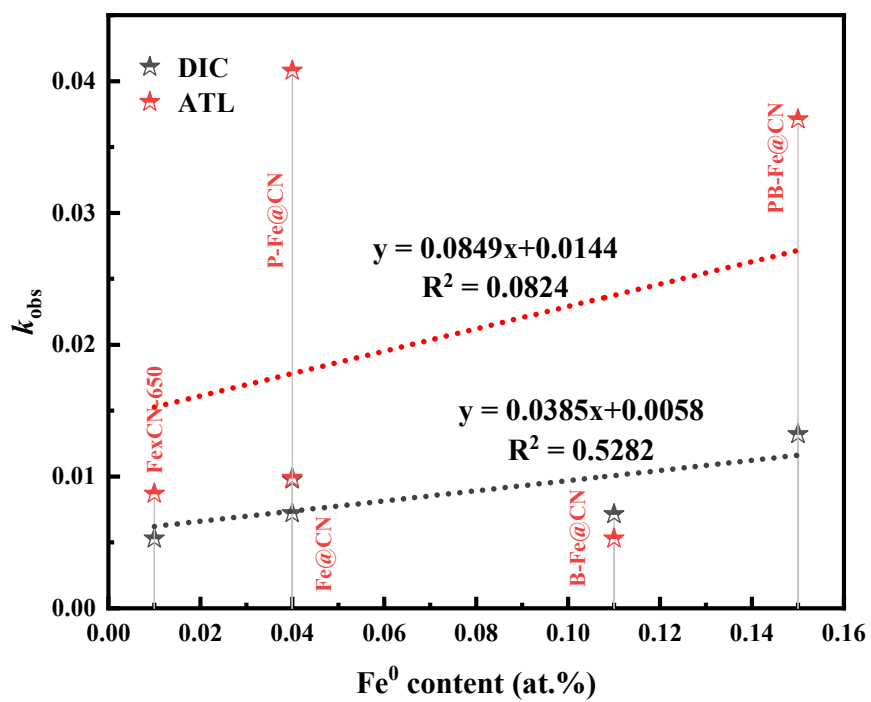

Figure S3. The correlation of  $k_{obs}$  of DIC and ATL removal to  $Fe^0$  content.

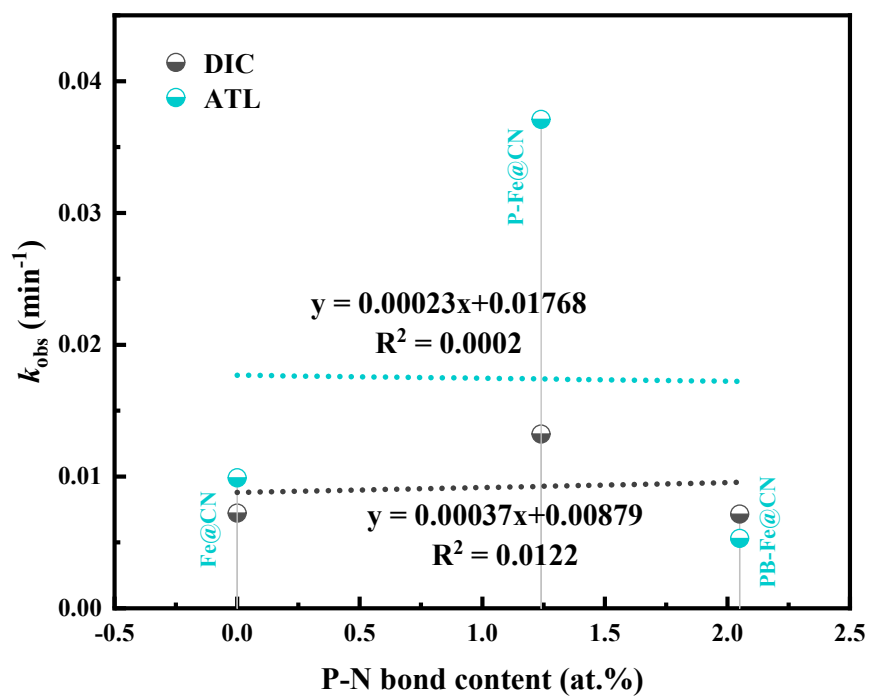

Figure S4. The correlation of  $k_{obs}$  of DIC and ATL removal to P-N bond content.

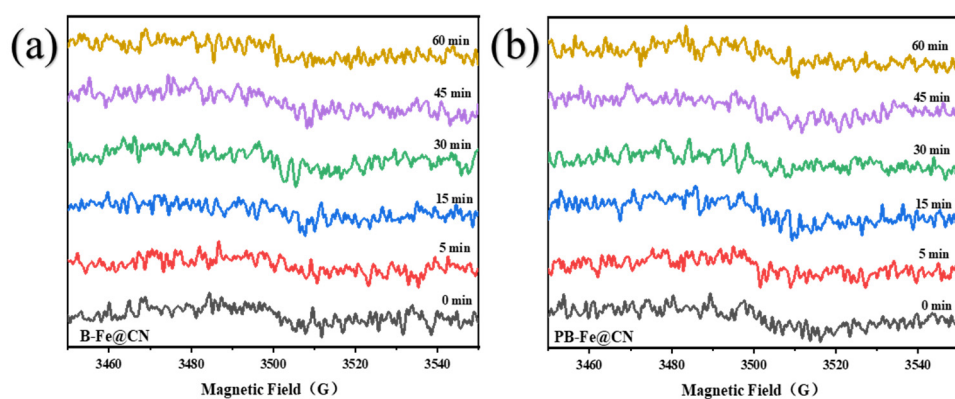

**Figure S5. EPR spectra obtained using DMPO as spin-trapping agents in anhydrous ethanol**

**Experimental conditions: [PMS] = 1.30 mM, [B-Fe@CN] = 200 mg/L, [PB-Fe@CN] = 400 mg/L, initial pH = 7.0.**
